# Supplementary material for: ThermoSlope: A Software for Determining Thermodynamic Parameters from Single Steady-State Experiments
Source: MDPI journal article supplement (doi:10.3390/molecules26237155), 2021-11-26
Supplement: s1 [file s1]

# ThermoSlope: a software for determining thermodynamic parameters from single steady-state experiments

Bjarte Aarmo Lund <sup>1,\*</sup> and Bjørn Olav Brandsdal <sup>1</sup>

<sup>1</sup> Hylleraas Centre for Quantum Molecular Sciences, Department of Chemistry, Faculty of Science and Technology, UiT The Arctic University of Norway, N9037 Tromsø, Norway

\* Correspondence: Bjarte.lund@uit.no; Tel.: +4777646477

## Supplementary information

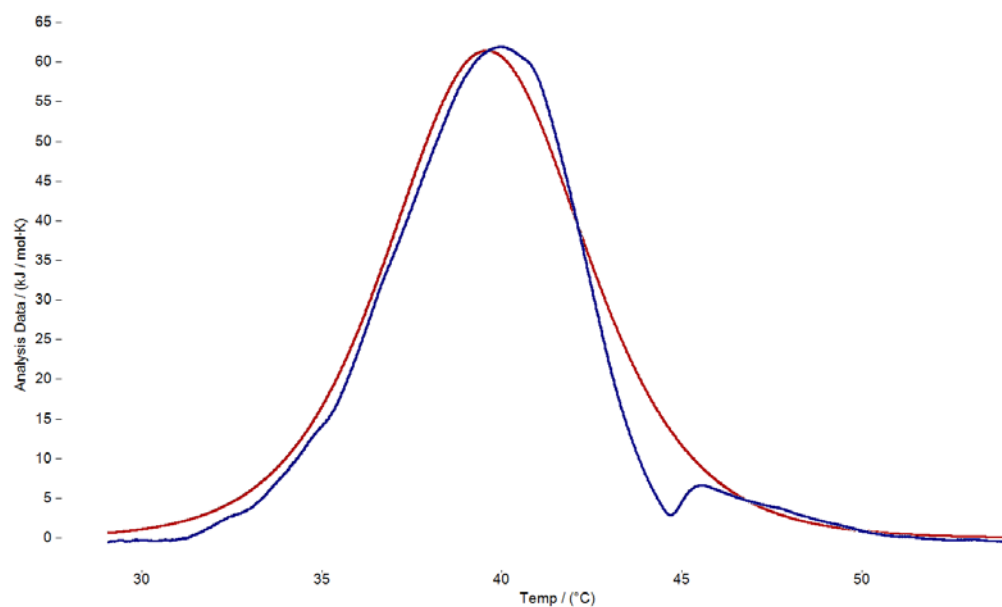

Figure S1: The differential scanning calorimetry curves (blue) for the thermal unfolding of pLipA reveals a single event that fits well to a two-state model (red). The fitted  $T_m$  is 39.6°C and the area under the curve corresponds to a  $\Delta H$  of 447 kcal/mol.
